# Supplementary material
Source: PubMed Central journal article supplement (PMC4336233)

## SUPPLEMENTARY INFORMATION

### **A genomic and clinical prognostic index for hepatitis C-related early-stage cirrhosis that predicts clinical deterioration**

Lindsay Y. King<sup>1</sup>, Claudia Canasto-Chibuque<sup>2</sup>, Kara Johnson<sup>1</sup>, Shun Yip<sup>2</sup>, Xintong Chen<sup>2</sup>, Kensuke Kojima<sup>2</sup>, Manjeet Deshmukh<sup>2</sup>, Anu Venkatesh<sup>2</sup>, Poh Seng Tan<sup>2,3</sup>, Xiaochen Sun<sup>2</sup>, Augusto Villanueva<sup>4</sup>, Angelo Sangiovanni<sup>5</sup>, Venugopalan Nair<sup>6</sup>, Milind Mahajan<sup>7</sup>, Masahiro Kobayashi<sup>8</sup>, Hiromitsu Kumada<sup>8</sup>, Massimo Iavarone<sup>5</sup>, Massimo Colombo<sup>5</sup>, Maria Isabel Fiel<sup>9</sup>, Scott L. Friedman<sup>2</sup>, Josep M. Llovet<sup>2,10,11</sup>, Raymond T. Chung<sup>1</sup>, Yujin Hoshida<sup>2</sup>

<sup>1</sup>Liver Center and Gastrointestinal Division, Department of Medicine, Massachusetts General Hospital, Harvard Medical School, U.S.

<sup>2</sup>Liver Cancer Program, Tisch Cancer Institute, Division of Liver Diseases, Department of Medicine, Icahn School of Medicine at Mount Sinai, U.S.

<sup>3</sup>Division of Gastroenterology and Hepatology, University Medicine Cluster, National University Health System, Singapore

<sup>4</sup>Institute of Liver Sciences, King's College London, U.K.

<sup>5</sup>M. & A. Migliavacca Center for Liver Disease and 1st Division of Gastroenterology, Fondazione IRCCS Cà Granda Ospedale Maggiore Policlinico, University of Milan, Italy

<sup>6</sup>Department of Neurology, Icahn School of Medicine at Mount Sinai, U.S.

<sup>7</sup>Institute of Genomics and Multiscale Biology, Icahn School of Medicine at Mount Sinai, U.S.

<sup>8</sup>Department of Hepatology, Toranomon Hospital, Japan

<sup>9</sup>Department of Pathology, Icahn School of Medicine at Mount Sinai, U.S.

<sup>10</sup>HCC Translational Research Laboratory, Barcelona Clinic Liver Cancer Group, Institut d'Investigacions Biomèdiques August Pi i Sunyer Centro de Investigaciones en Red de Enfermedades Hepáticas y Digestivas, Hospital Clínic Barcelona, Catalonia, Spain

<sup>11</sup>Institució Catalana de Recerca i Estudis Avancats (ICREA), Barcelona, Catalonia, Spain

### **Signature gene reduction**

The genes in the 186-gene signature were selected to be correlated with clinical outcome based on Cox score: a larger positive Cox score indicates stronger association with poor outcome, and a smaller negative Cox score indicates stronger association with good outcome.<sup>1</sup> The signature genes were reduced based on the Cox score in the training cohort, for which both genome-wide microarray and nCounter datasets were generated, and consistency of the prediction between reduced and full signatures was evaluated. First, subsets of the signature genes with larger absolute Cox scores calculated in the original genome-wide microarray dataset were selected based on the following cut-offs: 2.3, 2.5, and 3.0 (the smallest absolute Cox score was 2.13), which yielded 169, 116, and 32, signature genes, respectively. The best prediction consistency was observed at the Cox score cut-off of 3.0 (32-gene signature) (**Supplementary figure 3A, Supplementary table 4**). Alternatively, subsets of the signature genes were selected based on absolute Cox scores calculated in the nCounter dataset. At Cox score cut-offs of 1.0, 1.5, 2.0, 2.5, and 3.0, 97, 52, 32, 11, and 5 signature genes were selected, respectively. The best prediction consistency was observed at the cut-off of 2.5 (11-gene signature) (**Supplementary figure 3B, Supplementary table 5**). Association of the reduced gene signatures and overall death was evaluated by log-rank test (**Supplementary figure 4**). The prognostic index was calculated for each of the reduced gene signatures, and association with the clinical outcomes was verified using Cox regression modeling (**Supplementary table 6 and 7**).

## **REFERENCES**

1. Hoshida Y, Villanueva A, Kobayashi M, Peix J, Chiang DY, Camargo A, Gupta S, et al. Gene expression in fixed tissues and outcome in hepatocellular carcinoma. *N Engl J Med* 2008;359:1995-2004.

**Supplementary table 1**

Gene-signature-based prognostic prediction in paired serial biopsies and multiple anatomical locations in explanted liver.

| Case | Clinical diagnosis | Type of sample               | Necroinflammatory grade | Fibrosis stage | Interval between paired biopsies | 186-gene signature prediction |
|------|--------------------|------------------------------|-------------------------|----------------|----------------------------------|-------------------------------|
| #1   | Chronic hepatitis  | Core needle biopsy #1        | 5                       | 2              | 7.5 years                        | Good                          |
|      |                    | Core needle biopsy #2        | 5                       | 2              |                                  | Good                          |
| #2   | Chronic hepatitis  | Core needle biopsy #1        | 5                       | 0              | 4 months                         | Intermediate                  |
|      |                    | Core needle biopsy #1*       | 5                       | 0              |                                  | Intermediate                  |
|      |                    | Core needle biopsy #2        | 5                       | 0              |                                  | Good                          |
| #3   | Cirrhosis          | Core needle biopsy #1        | 6                       | 5              | 1 month                          | Poor                          |
|      |                    | Core needle biopsy #2        | 6                       | 5              |                                  | Intermediate                  |
| #4   | Cirrhosis**        | Explanted liver, right. lobe | 2                       | 0              | n.a.                             | Poor                          |
|      |                    | Explanted liver, left lobe   | 2                       | 0              |                                  | Poor                          |

\*Technical replicate of RNA sample.

\*\*Specimens were obtained from allograft with rejection.

Necroinflammatory grade (max possible score: 18) and fibrosis stage (max possible score: 6) are based on Ishak, et al. J Hepatol 22;696-699,1995.

**Supplementary table 2**

Prognostic association of the prognostic index in the training cohort (Cox regression).

| Variable                                           | Hazard ratio<br>(95% confidence interval) | p-value |
|----------------------------------------------------|-------------------------------------------|---------|
| <u>Hepatic decompensation (n=71, 34%)</u>          |                                           |         |
| Intermediate risk group                            | 1.67 (0.85-3.27)                          | 0.14    |
| High risk group                                    | 2.71 (1.42-5.18)                          | 0.003   |
| <u>Overall death (n=66, 31%)</u>                   |                                           |         |
| Intermediate risk group                            | 1.72 (0.78-3.81)                          | 0.18    |
| High risk group                                    | 6.00 (2.85-12.64)                         | <0.001  |
| <u>Hepatocellular carcinoma (n=65, 30%)</u>        |                                           |         |
| Intermediate risk group                            | 2.06 (1.03-4.11)                          | 0.04    |
| High risk group                                    | 3.31 (1.62-6.77)                          | 0.001   |
| <u>Progression of Child-Pugh class (n=66, 31%)</u> |                                           |         |
| Intermediate risk group                            | 2.09 (0.90-4.81)                          | 0.08    |
| High risk group                                    | 6.70 (3.04-14.75)                         | <0.001  |

Hazard ratios were computed by comparing to low risk group. Hepatic decompensation is the composite of variceal bleeding, ascites, and hepatic encephalopathy.

**Supplementary table 3**

Comparison of clinical demographics with previously reported prognostic studies for hepatitis C-related Child-Pugh class A/compensated cirrhosis

|                                                 | Our validation cohort                      | Individual studies describing hepatitis C-related Child-Pugh A/compensated cirrhosis |                                        |                                                          |                                                            |                                                         |                                               |                                                            |                                                  | Reviews including other etiologies             |                                                          |                                                    |                  |
|-------------------------------------------------|--------------------------------------------|--------------------------------------------------------------------------------------|----------------------------------------|----------------------------------------------------------|------------------------------------------------------------|---------------------------------------------------------|-----------------------------------------------|------------------------------------------------------------|--------------------------------------------------|------------------------------------------------|----------------------------------------------------------|----------------------------------------------------|------------------|
|                                                 |                                            | Our training cohort<br>Gastroenterology<br>2013;144:1024-30                          | Degoss, et al.<br>Gut<br>2000;47:131-6 | Fattovich, et al.<br>Gastroenterology<br>1997;112:463-72 | Fattovich, et al.<br>Am J Gastroenterol<br>2002;97:2886-95 | Bruno, et al.<br>Am J Gastroenterol<br>2009;104:1147-58 | Ikeeda, et al.<br>Hepatology<br>1993;18:47-53 | Hu, et al.<br>Hepatology<br>1999;29:1311-6                 | Serfaty, et al.<br>Hepatology<br>1998;27:1435-40 | D'Amico, et al.<br>J Hepatol<br>2006;44:217-31 | Fattovich, et al.<br>Gastroenterology<br>2004;127:535-50 | de Franchis, et al.<br>J Hepatol<br>2005;43:167-76 |                  |
| No. of patients                                 | 145                                        | 216                                                                                  | 416                                    | 384                                                      | 136                                                        | 352                                                     | 349                                           | 112                                                        | 103                                              | 20-114 studies                                 | 1284 (13 studies)                                        | 626 (7 studies)                                    | 1649 (2 studies) |
| Age (yr) - median (range)                       | 49 (45-55)                                 | 59 (34-75)                                                                           | 57 (IQR:46-64)                         | mean 54 (19-78)                                          | 58 (22-79)                                                 | 59 (21-70)                                              | 55 (25-84)                                    | 51 (30-78)                                                 | 55                                               | -                                              | 56                                                       | 59                                                 | -                |
| Sex - male (%)                                  | 107 (74%)                                  | 116 (54%)                                                                            | 240 (58%)                              | 223 (58%)                                                | 81 (61%)                                                   | 180 (51%)                                               | 234 (67%)                                     | 56 (50%)                                                   | 72 (70%)                                         | -                                              | 58%                                                      | 58%                                                | -                |
| Ethnicity                                       | Caucasian (85%), Black (6%), Hispanic (7%) | Caucasian                                                                            | -                                      | Caucasian (96%), Asian (3%), African (1%)                | Caucasian                                                  | na                                                      | Asian                                         | Caucasian (58%), Hispanic (22%), Asian (16%), African (4%) | -                                                | -                                              | -                                                        | Asian                                              | -                |
| Geographic site                                 | United States                              | Europe                                                                               | Europe                                 | Europe                                                   | Europe                                                     | Europe                                                  | Japan                                         | United States                                              | Europe                                           | -                                              | Europe/United States                                     | Japan                                              | -                |
| Severity of cirrhosis - Child-Pugh A (%)        | 83%, Compensated (100%)                    | 100%                                                                                 | 100%                                   | Compensated (100%)                                       | 100%                                                       | 100%                                                    | Compensated (94%)                             | Compensated (100%)                                         | 91%                                              | 100%                                           | Compensated                                              | Compensated                                        | -                |
| Etiology - hepatitis C (%)                      | 100%                                       | 100%                                                                                 | 100%                                   | 100%                                                     | 100%                                                       | 100%                                                    | 100%                                          | 100%                                                       | 100%                                             | median 35 %<br>(range: 0-100%)                 | 100%                                                     | 100%                                               | -                |
| Hepatitis C virus genotype 1b (%)               | 93 (72%), genotype 1                       | 122 (58%)                                                                            | -                                      | -                                                        | -                                                          | 221 (63%)                                               | -                                             | 59 (53%)                                                   | 49 (48%)                                         | -                                              | -                                                        | -                                                  | -                |
| History of interferon treatment                 | -                                          | 101 (47%)                                                                            | 223 (54%)                              | 205 (53%)                                                | 0%                                                         | 194 (55%)                                               | -                                             | 49 (44%)                                                   | 59 (57%)                                         | -                                              | -                                                        | -                                                  | -                |
| Gastric/esophageal varices                      | -                                          | 52 (25%)                                                                             | 175 (42%)                              | 79 (41%)                                                 | 44 (52%)                                                   | 51 (14%)                                                | -                                             | -                                                          | -                                                | -                                              | -                                                        | -                                                  | -                |
| Incidence of death - no. (%)                    | 50 (34%)                                   | 66 (31%)                                                                             | 83 (20%)                               | 51 (13%)                                                 | 52 (38%)                                                   | 158 (45%)                                               | 126 (36%)                                     | 15 (13%)                                                   | 16 (16%)                                         | median 36%<br>(range: 11-100%)                 | -                                                        | -                                                  | -                |
| - Annual rate                                   | 1.7%*                                      | 2.1%*                                                                                | 3.3%*                                  | 1.9%                                                     | 3.5%*                                                      | 3.0%                                                    | 3.5%* (with other etiologies)                 | 3.4%                                                       | 3.5%*                                            | -                                              | -                                                        | -                                                  | -                |
| - Annual rate in Baveno IV stage 1**            | -                                          | 1.8%*                                                                                | -                                      | -                                                        | -                                                          | -                                                       | -                                             | -                                                          | -                                                | -                                              | -                                                        | -                                                  | 1.0%             |
| - Annual rate in Baveno IV stage 2**            | -                                          | 3.5%*                                                                                | -                                      | -                                                        | -                                                          | -                                                       | -                                             | -                                                          | -                                                | -                                              | -                                                        | -                                                  | 3.4%             |
| - 1yr survival rate                             | 100%                                       | 99%                                                                                  | -                                      | -                                                        | -                                                          | -                                                       | 98% (with other etiologies)                   | -                                                          | -                                                | 94% (range: 75-100%)                           | -                                                        | -                                                  | -                |
| - 2yr survival rate                             | 98%                                        | 99%                                                                                  | -                                      | -                                                        | -                                                          | -                                                       | 96% (with other etiologies)                   | -                                                          | 96%                                              | 90% (range: 70-100%)                           | -                                                        | -                                                  | -                |
| - Liver-related death (%)                       | 64%                                        | 72%                                                                                  | 77%                                    | 70%                                                      | 67%                                                        | 70%                                                     | 83% (with other etiologies)                   | 95%                                                        | 94%                                              | -                                              | -                                                        | -                                                  | -                |
| Incidence of hepatic decompensation - no. (%)   | 45 (31%)                                   | 71 (34%)                                                                             | -                                      | 65 (18%)                                                 | 49 (36%)                                                   | 131 (37%)                                               | -                                             | 24 (21%)                                                   | 45 (44%)                                         | -                                              | -                                                        | -                                                  | -                |
| - Annual rate                                   | 3.9%*                                      | 3.3%*                                                                                | -                                      | -                                                        | 5.3%                                                       | 3.5%                                                    | -                                             | 4.4%                                                       | -                                                | -                                              | -                                                        | -                                                  | -                |
| - Ascites - no.                                 | 34                                         | 62                                                                                   | -                                      | 31                                                       | -                                                          | 66                                                      | -                                             | 10                                                         | -                                                | -                                              | -                                                        | -                                                  | -                |
| - Bleeding - no.                                | 17                                         | 22                                                                                   | -                                      | 14                                                       | -                                                          | 22                                                      | -                                             | 5                                                          | -                                                | -                                              | -                                                        | -                                                  | -                |
| - Encephalopathy - no.                          | 27                                         | 10                                                                                   | -                                      | 5                                                        | -                                                          | 21                                                      | -                                             | 4                                                          | -                                                | -                                              | -                                                        | -                                                  | -                |
| Incidence of hepatocellular carcinoma - no. (%) | 21 (14%)                                   | 65 (30%)                                                                             | 60 (14%)                               | 29 (8%)                                                  | 23 (17%)                                                   | 109 (31%)                                               | 154 (44%)                                     | 9 (8%)                                                     | 11 (11%)                                         | -                                              | -                                                        | -                                                  | -                |
| - Annual rate                                   | 1.3%*                                      | 2.9%                                                                                 | 2.9%*                                  | 1.4%                                                     | 2.5%                                                       | 2.9%                                                    | 4.8%*                                         | 2.0%                                                       | 3.3%                                             | -                                              | 3.7%                                                     | 7.1%                                               | -                |
| Follow-up time (yr) - median (range)            | 8.0 (1.2-22.9)                             | 9.8 (0.5-22.6)                                                                       | 5.7 (0.3-16.6)                         | 5.1 (0.5-12.8)                                           | 6.8 (0.5-15.9)                                             | 14.4 (0.9-19.5)                                         | 5.8 (2.0-17.0)                                | mean 4.5 (2.0-7.7)                                         | 3.3 (0.5-6.0)                                    | median 2.6<br>(range: 0.5-14)                  | -                                                        | -                                                  | -                |

\*Annual rate was calculated using Declining Exponential Approximation of Life Expectancy (DEALE) based on cumulative 5-year incidence [Beck, et al. Am J Med 73:889-97,1982].

\*\*de Franchis, J Hepatol 2005;43(1):167-76

**Supplementary table 4**

Reduced 186-gene signature (32-gene signature) based on Cox score calculated in genome-wide microarray dataset.

| Entrez gene ID | Gene symbol | Gene name                                                                        | Correlated with | Cox score |
|----------------|-------------|----------------------------------------------------------------------------------|-----------------|-----------|
| 2488           | FSHB        | follicle stimulating hormone, beta polypeptide                                   | poor outcome    | 4.80      |
| 6456           | SH3GL2      | SH3-domain GRB2-like 2                                                           | poor outcome    | 4.21      |
| 23029          | RBM34       | RNA binding motif protein 34                                                     | poor outcome    | 4.19      |
| 23397          | NCAPH       | non-SMC condensin I complex, subunit H                                           | poor outcome    | 4.02      |
| 1950           | EGF         | epidermal growth factor (beta-urogastrone)                                       | poor outcome    | 3.97      |
| 7204           | TRIO        | triple functional domain (PTPRF interacting)                                     | poor outcome    | 3.90      |
| 1293           | COL6A3      | collagen, type VI, alpha 3                                                       | poor outcome    | 3.87      |
| 3983           | ABLIM1      | actin binding LIM protein 1                                                      | poor outcome    | 3.86      |
| 3680           | ITGA9       | integrin, alpha 9                                                                | poor outcome    | 3.81      |
| 4922           | NTS         | neurotensin                                                                      | poor outcome    | 3.78      |
| 5055           | SERPINB2    | serpin peptidase inhibitor, clade B (ovalbumin), member 2                        | poor outcome    | 3.69      |
| 4316           | MMP7        | matrix metalloproteinase 7 (matrilysin, uterine)                                 | poor outcome    | 3.59      |
| 5593           | PRKG2       | protein kinase, cGMP-dependent, type II                                          | poor outcome    | 3.44      |
| 9170           | EDG4        | endothelial differentiation, lysophosphatidic acid G-protein-coupled receptor, 4 | poor outcome    | 3.40      |
| 4843           | NOS2A       | nitric oxide synthase 2A (inducible, hepatocytes)                                | poor outcome    | 3.33      |
| 2043           | EPHA4       | EPH receptor A4                                                                  | poor outcome    | 3.25      |
| 6672           | SP100       | SP100 nuclear antigen                                                            | poor outcome    | 3.19      |
| 2326           | FMO1        | flavin containing monooxygenase 1                                                | poor outcome    | 3.04      |
| 2877           | GPX2        | glutathione peroxidase 2 (gastrointestinal)                                      | poor outcome    | 3.02      |
| 9252           | RPS6KA5     | ribosomal protein S6 kinase, 90kDa, polypeptide 5                                | good outcome    | -3.00     |
| 5313           | PKLR        | pyruvate kinase, liver and RBC                                                   | good outcome    | -3.01     |
| 27346          | TMEM97      | transmembrane protein 97                                                         | good outcome    | -3.06     |
| 5502           | PPP1R1A     | protein phosphatase 1, regulatory (inhibitor) subunit 1A                         | good outcome    | -3.07     |
| 5691           | PSMB3       | proteasome (prosome, macropain) subunit, beta type, 3                            | good outcome    | -3.09     |
| 5771           | PTPN2       | protein tyrosine phosphatase, non-receptor type 2                                | good outcome    | -3.12     |
| 151            | ADRA2B      | adrenergic, alpha-2B-, receptor                                                  | good outcome    | -3.19     |
| 6296           | ACSM3       | acyl-CoA synthetase medium-chain family member 3                                 | good outcome    | -3.21     |
| 3612           | PFKFB1      | inositol(myo)-1(or 4)-monophosphatase 1                                          | good outcome    | -3.22     |
| 5207           | IMPA1       | 6-phosphofructo-2-kinase/fructose-2,6-biphosphatase 1                            | good outcome    | -3.22     |
| 6018           | RLF         | rearranged L-myc fusion                                                          | good outcome    | -3.23     |
| 7276           | TTR         | transthyretin (prealbumin, amyloidosis type I)                                   | good outcome    | -3.27     |
| 223            | ALDH9A1     | aldehyde dehydrogenase 9 family, member A1                                       | good outcome    | -3.34     |

**Supplementary table 5**

Reduced 186-gene signature (11-gene signature) based on Cox score calculated in nCounter dataset.

| Entrez gene ID | Gene symbol | Gene name                                    | Correlated with | Cox score |
|----------------|-------------|----------------------------------------------|-----------------|-----------|
| 1293           | COL6A3      | collagen, type VI, alpha 3                   | poor outcome    | 3.87      |
| 8870           | IER3        | immediate early response 3                   | poor outcome    | 2.98      |
| 165            | AEBP1       | AE binding protein 1                         | poor outcome    | 2.67      |
| 6363           | CCL19       | chemokine (C-C motif) ligand 19              | poor outcome    | 2.23      |
| 10458          | BAIAP2      | BAI1-associated protein 2                    | good outcome    | -2.31     |
| 1486           | CTBS        | chitinase, di-N-acetyl-                      | good outcome    | -2.54     |
| 157567         | ANKRD46     | ankyrin repeat domain 46                     | good outcome    | -2.54     |
| 6718           | AKR1D1      | aldo-keto reductase family 1, member D1      | good outcome    | -2.76     |
| 3479           | IGF1        | insulin-like growth factor 1 (somatomedin C) | good outcome    | -2.84     |
| 25828          | TXN2        | thioredoxin 2                                | good outcome    | -2.90     |
| 27346          | TMEM97      | transmembrane protein 97                     | good outcome    | -3.06     |



**Supplementary table 6**

Prognostic association of the prognostic index based on reduced 186-gene signature (32-gene signature).  
(Cox regression).

| Variable                                            | Hazard ratio<br>(95% confidence interval) | p-value |
|-----------------------------------------------------|-------------------------------------------|---------|
| <u>Hepatic decompensation (n=45, 31%)</u>           |                                           |         |
| Intermediate risk group                             | 2.46 (1.14-5.30)                          | 0.02    |
| High risk group                                     | 5.85 (2.65-12.92)                         | <0.001  |
| <u>Overall death (n=50, 34%)</u>                    |                                           |         |
| Intermediate risk group                             | 1.93 (0.97-3.85)                          | 0.06    |
| High risk group                                     | 3.42 (1.63-7.19)                          | 0.001   |
| <u>Liver-related death (n=32, 22%)</u>              |                                           |         |
| Intermediate risk group                             | 1.88 (0.74-4.77)                          | 0.18    |
| High risk group                                     | 5.07 (2.03-12.65)                         | <0.001  |
| <u>All liver-related adverse events (n=59, 41%)</u> |                                           |         |
| Intermediate risk group                             | 2.71 (1.42-5.21)                          | 0.003   |
| High risk group                                     | 4.18 (2.02-8.68)                          | <0.001  |

Hazard ratios were computed by comparing to low risk group. Hepatic decompensation is the composite of variceal bleeding, ascites, and hepatic encephalopathy. The composite outcome incorporates hepatic decompensation, HCC, and liver-related death.

**Supplementary table 7**

Prognostic association of the prognostic index based on reduced 186-gene signature (11-gene signature).  
(Cox regression).

| Variable                                            | Hazard ratio<br>(95% confidence interval) | p-value |
|-----------------------------------------------------|-------------------------------------------|---------|
| <u>Hepatic decompensation (n=45, 31%)</u>           |                                           |         |
| Intermediate risk group                             | 3.02 (1.38-6.60)                          | 0.006   |
| High risk group                                     | 7.24 (3.20-16.37)                         | <0.001  |
| <u>Overall death (n=50, 34%)</u>                    |                                           |         |
| Intermediate risk group                             | 1.84 (0.93-3.65)                          | 0.08    |
| High risk group                                     | 3.67 (1.79-7.53)                          | <0.001  |
| <u>Liver-related death (n=32, 22%)</u>              |                                           |         |
| Intermediate risk group                             | 2.01 (0.79-5.08)                          | 0.14    |
| High risk group                                     | 5.87 (2.357-14.62)                        | <0.001  |
| <u>All liver-related adverse events (n=59, 41%)</u> |                                           |         |
| Intermediate risk group                             | 3.21 (1.66-6.20)                          | <0.001  |
| High risk group                                     | 5.12 (2.43-10.76)                         | <0.001  |

Hazard ratios were computed by comparing to low risk group. Hepatic decompensation is the composite of variceal bleeding, ascites, and hepatic encephalopathy. The composite outcome incorporates hepatic decompensation, HCC, and liver-related death.

## **SUPPLEMENTARY FIGURE LEGENDS**

### **Supplementary figure 1**

Probability of clinical outcomes analyzed in the validation cohort: (A) hepatic decompensation, (B) overall death, (C) liver-related death, and (D) all liver-related adverse events..

### **Supplementary figure 2**

Association of the 186-gene signature-based prediction with overall death. P-value was calculated by log-rank test.

### **Supplementary figure 3**

Consistency of prediction results between full and reduced gene signatures (training cohort). (A) Signature gene reduction based on Cox scores calculated in genome-wide microarray dataset. (B) Signature gene reduction based on Cox scores calculated in nCounter dataset.

### **Supplementary figure 4**

Association of reduced gene signature-based prediction and overall death (validation cohort). (A) Prediction based on the 32-gene signature. (B) Prediction based on the 11-gene signature. P-values were calculated by log-rank test.

# Supplementary figure 1

**A** Hepatic decompensation

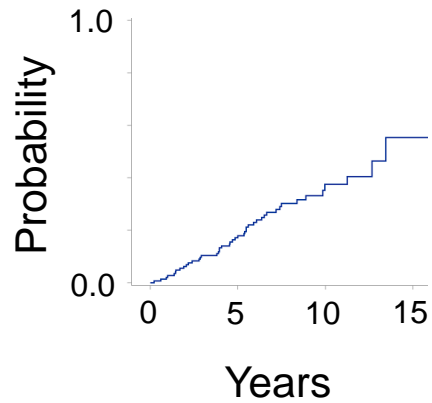

**B** Overall death

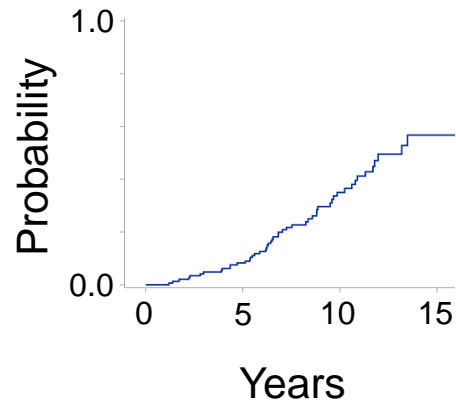

**C** Liver-related death

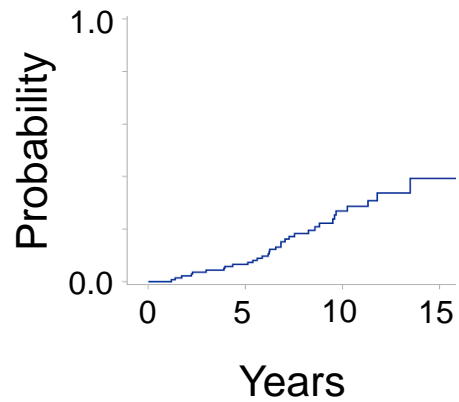

**D** Composite of all liver-related adverse events

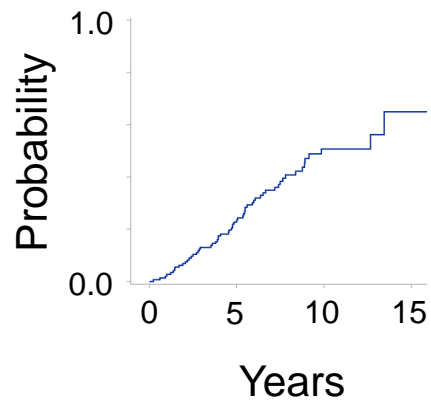

# Supplementary figure 2

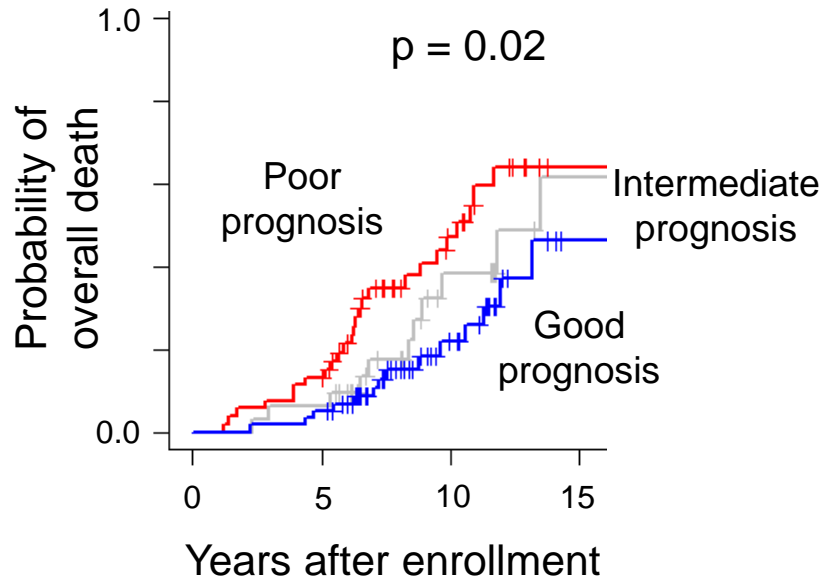

|                        | <u>No. at risk</u> |    |    |   |
|------------------------|--------------------|----|----|---|
| Poor prognosis         | 53                 | 46 | 15 | 1 |
| Intermediate prognosis | 32                 | 30 | 10 | 3 |
| Good prognosis         | 60                 | 57 | 21 | 3 |

# Supplementary figure 3

A

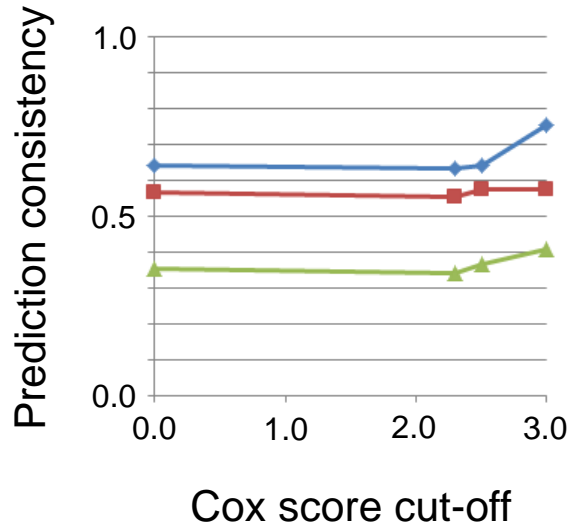

B

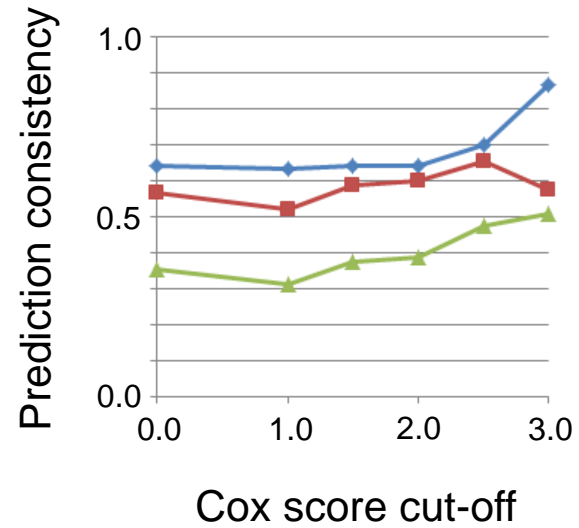

- Prediction of
- ◆— Poor or non-poor prognosis
  - Good or non-good prognosis
  - ▲— Poor, intermediate, or good prognosis

# Supplementary figure 4

## A

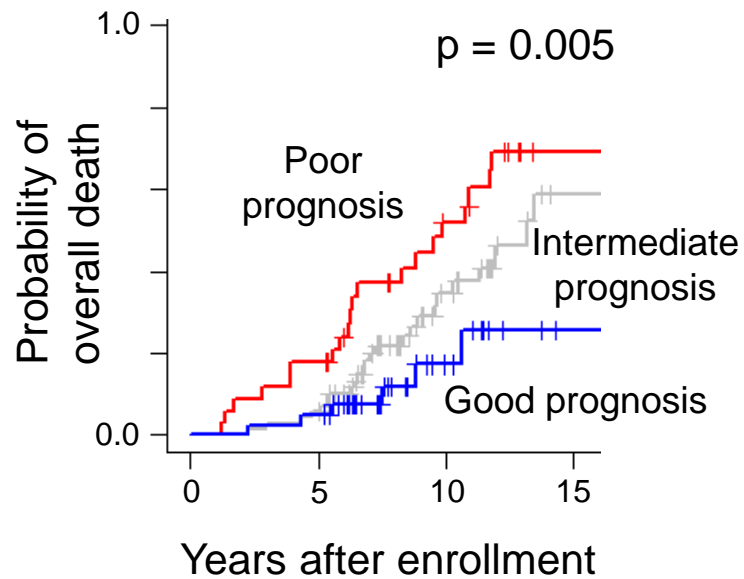

## B

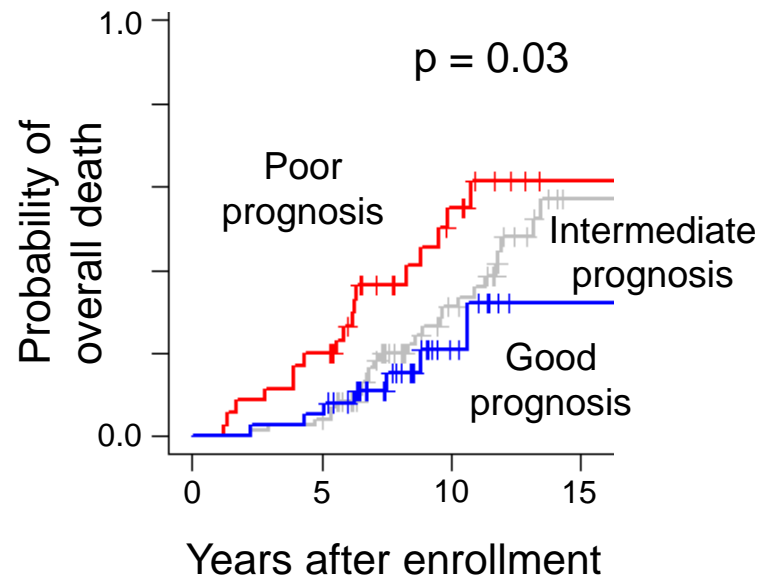

Supplement: NIHMS623024-supplement-Supplementary_information.pdf [file NIHMS623024-supplement-Supplementary_information.pdf]
